# Supplementary material
Source: publisher figshare collection journal article supplement (https://acs.figshare.com/ndownloader/files/10715542)
Supplement: Supplementary file 1 [file 10715542]

## Supplemental Information

# Neutron crystallography detects differences in protein dynamics: Structure of PKG II cyclic nucleotide binding domain in complex with an activator

Oksana Gerlits,<sup>1</sup> James C. Campbell,<sup>2</sup> Matthew P. Blakeley,<sup>3</sup> and Choel Kim<sup>\*2,4</sup>, Andrey Kovalevsky,<sup>5\*</sup>

<sup>1</sup>Bredesen Center, University of Tennessee, Tennessee 37996, United States

<sup>2</sup>Department of Pharmacology and Chemical Biology, Baylor College of Medicine, Houston, Texas 77030, United States

<sup>3</sup>Large-Scale Structures Group, Institut Laue Langevin, Grenoble Cedex 9, 38042, France

<sup>4</sup>Verna and Marrs McLean Department of Biochemistry and Molecular Biology, Baylor College of Medicine, Houston, Texas 77030, United States

<sup>5</sup>Neutron Sciences Directorate, Oak Ridge National Laboratory, Oak Ridge, Tennessee 37831, United States

## MATERIALS AND METHODS

**Protein Expression and Purification.** The truncated CNB-B domains of human PKG I and II were expressed and purified as described previously [1]. Briefly, the CNB-B domains of PKG I and II were cloned into the pQTEV vector and overexpressed in the TP2000 cell lines [2, 3]. Tobacco Etch Virus (TEV) protease cleavable, 7 x His-tagged, CNB-Bs were first purified by using nickel affinity chromatography. Elution fractions were dialyzed overnight with TEV and then passed over a second nickel affinity column. The flow through was concentrated and injected on a Superdex S75 size exclusion chromatography column. The protein sample was flash frozen and stored at -80C, sample purity >95% was confirmed by SDS-PAGE.

**Crystallization.** For crystallization trials the complex PKG II:8-pCPT-cGMP (with the final concentration of ~35 mg/mL for PKG II and 5 mM for the analog), and the reservoir (30% MPD, 20 mM SrCl<sub>2</sub>, 100 mM NaOAc pH 4.6 in H<sub>2</sub>O) solutions were combined at a 1:1 ratio in the 30

$\mu$ L sitting drops and incubated at 4°C. Over a period of three weeks some drops yielded showers of small crystals, while others resulted in precipitate formation. A recrystallization procedure was then applied as follows: sitting drops in Hampton microbridges were held over water for a few days at 10°C until some of them became clear, indicating that the protein complex had redissolved. The drops then were returned to the original reservoir solution and placed back to 4°C. A few drops produced large crystals; one crystal that appeared suitable for neutron diffraction was mounted in a quartz capillary containing the reservoir solution made with 100% D<sub>2</sub>O and per-deuterated MPD. The labile H atoms were allowed to exchange with deuterium by vapour for several weeks before starting neutron data collection. This crystal was also used for room-temperature X-ray data collection that was done after the neutron diffraction data had been collected.

**Data collection.** The crystal diffraction quality was tested and preliminary data were collected on the IMAGINE [4] instrument located at the High Flux Isotope Reactor (Oak Ridge National Laboratory) from a 0.6 mm<sup>3</sup> PKGII:8-pCPT-cGMP crystal at room temperature. The crystal demonstrated good diffraction pattern and was then considered for full data collection. The beamtime was awarded and the complete dataset was collected at room temperature on the LADI-III beamline at the Institut Laue-Langevin [5]. Quasi-Laue neutron data were collected to 2.2 Å resolution. As is usual for a Laue experiment, the crystal was held stationary at a different  $\phi$  setting for each exposure. In total 17 images were collected (with an average exposure time of 24 h per image) from 3 different crystal orientations. The neutron data were processed using the Daresbury Laboratory *LAUE* suite program *LAUEGEN* [6] modified to account for the cylindrical geometry of the detector [7]. The program *LSCALE* [8] was used to determine the wavelength-normalization curve using the intensities of symmetry-equivalent reflections

measured at different wavelengths. No explicit absorption corrections were applied. These data were then merged in *SCALA* [9]. Monochromatic X-ray diffraction data were collected from the same crystal used for the neutron diffraction data collection using an in-house Rigaku HomeFlux system, equipped with a MicroMax-007 HF generator and Osmic VariMax optics. The diffraction images were obtained using an RAXIS-IV++ image-plate detector. Diffraction data were collected, integrated and scaled using HKL3000 software suite [10]. The structure was solved by molecular replacement using Phaser from CCP4 suite [11] and the PKG II CNB-B:cGMP binary complex (PDB ID 5BV6) [1] was used as a starting model. The room-temperature X-ray structure of the PKGII:8-pCPT-cGMP complex was refined using *SHELX-97* [12] at the resolution of 2.0 Å before using it as a starting model in the joint XN refinement. A summary of the experimental and refinement statistics is given in Table S1.

**Joint XN structure refinement.** The joint XN structure of the PKGII:8-pCPT-cGMP complex was determined using *nCNS* [13] and manipulated in *Coot* [14]. After initial rigid-body refinement, several macrocycles of positional, atomic displacement parameter, and occupancy refinement followed. Between each macrocycle the structure was checked, side-chain conformations were altered and water molecule orientations were built based on the  $F_O-F_C$  difference neutron scattering density map. The  $2F_O-F_C$  and  $F_O-F_C$  neutron scattering density maps were then examined to determine the correct orientation of hydroxyl (Ser, Thr, Tyr) and ammonium (Lys) groups, and protonation states of His and Lys residues. The protonation states of some disordered side chains could not be obtained directly, and remained ambiguous. All water molecules were refined as D<sub>2</sub>O. Initially, water oxygen atoms were positioned according to their electron density peaks, and then were shifted slightly in accordance with the neutron scattering density maps. The level of H/D exchange at OH, NH and SH sites was refined. All

labile H positions in PKG II and the ligand were modelled as D, and then the occupancy of D was allowed to refine within the range of -0.56 to 1.00 (the scattering length of H is -0.56 times the scattering length of D). Before depositing the final structure to the PDB, a script was run that converts a record for the coordinate of D atom into two records corresponding to an H and a D atom partially occupying the same site, both with positive partial occupancies that add up to unity. The joint XN structure of PKGII-8-pCPT-cGMP has been deposited to the Protein Data Bank (code 6BQ8).

**Fluorescence Polarization Assay.** Fluorescence polarization (FP) was used to measure the binding affinity of 8-fluo-cGMP to the CNB domain constructs. The assay was conducted in 150 mM NaCl, 20 mM MOPS, 0.005% (v/v) Tween-20, pH 7.0, 1nM 8-fluo-cGMP (Biolog Life Science Institute, Bremen, Germany) in a black, flat-bottomed 384-well plate (Perkin Elmer, Optiplate). The FP signal was read for 2 seconds per well at an excitation wavelength of 485 nm and an emission wavelength of 535 nm, on BioTek Synergy2 equipped with a FITC optics cube. Data were analyzed and fit to a sigmoidal dose response curve using GraphPad Prism 5.03 (GraphPad Software, San Diego, CA) to generate  $K_D$  values. Competition experiments were performed at concentration approximately equal to the  $K_D$  of the direct binding assay and 8-fluo-cGMP was added to a final concentration of 1 nM. The 8-pCPT-cGMP was titrated via a serial dilution. Polarization data were measured and analyzed as described above to generate  $EC_{50}$  values.

## References

1. Campbell, J. C.; Kim, J. J.; Li, K. Y.; Huang, G. Y.; Reger, A. S.; Matsuda, S.; Sankaran, B.; Link, T. M.; Yuasa, K.; Ladbury, J. E.; Casteel, D. E.; Kim, C. Structural basis of cyclic

nucleotide selectivity in cGMP-dependent protein kinase II. *J. Biol. Chem.* 2016, 291, 5623-5633.

2. Scheich, C.; Niesen, F. H.; Seckler, R.; Bussow, K. An automated in vitro protein folding screen applied to a human dynactin subunit. *Protein Sci.* 2004, 13, 370-380.

3. Brickman, E.; Soll, L.; Beckwith, J. Genetic characterization of mutations which affect catabolite-sensitive operons in *Escherichia coli*, including deletions of the gene for adenyl cyclase. *J. Bacteriol.* 1973, 116, 582-587.

4. Meilleur, F.; Munshi, P.; Robertson, L.; Stoica, A. D.; Crow, L.; Kovalevsky, A.; Koritsanszky, T.; Chakoumakos, B. C.; Blessing, R.; Myles, D. A. A. The IMAGINE instrument: first neutron protein structure and new capabilities for neutron macromolecular crystallography, *Acta Crystallogr. D Biol. Crystallogr.* 2013, 69, 2157-2160.

5. Blakeley, M. P.; Teixeira, S. C. M.; Petit-Haertlein, I.; Hazemann, I.; Mitschler, A.; Haertlein, M.; Howard, E.; Podjarny, A. D. Neutron macromolecular crystallography with LADI-III. *Acta Cryst.* 2010, D66, 1198-1205.

6. Campbell, J. W. LAUEGEN, an X-windows-based program for the processing of Laue diffraction data. *J. Appl. Cryst.* 1995, 28, 228-236.

7. Campbell, J. W.; Hao, Q.; Harding, M. M.; Nguti, N. D.; Wilkinson, C. LAUEGEN version 6.0 and INTLDM. *J. Appl. Cryst.* 1998, 31, 496-502.

8. Arzt, S.; Campbell, J. W.; Harding, M. M.; Hao, Q.; Helliwell, J. R. LSCALE - the new normalization, scaling and absorption correction program in the Daresbury Laue software suite. *J. Appl. Cryst.* 1999, 32, 554-562.

9. Weiss, M. S. Global indicators of X-ray data quality. *J. Appl. Cryst.* 2001, 34, 130-135.

10. Minor, W.; Cymborowski, M.; Otwinowski, Z.; Chruszcz, M. HKL3000: the integration of data reduction and structure solution – from diffraction images to an initial model in minutes. *Acta Cryst.* 2006, D62, 859-866.

11. Collaborative CP. The CCP4 suite: programs for protein crystallography. *Acta crystallographica Section D, Biological crystallography.* 1994, 50, 760.

12. Sheldrick, G. M. A short history of SHELX. *Acta Cryst.* 2008, A64, 112-122.
13. Adams, P. D.; Mustyalimov, M.; Afonine, P. V.; Langan, P. Generalized X-ray and neutron crystallographic analysis: more accurate and complete structures for biological macromolecules. *Acta Cryst.* 2009, D65, 567-573.
14. Emsley, P.; Lohkamp, B.; Scott, W. G.; Cowtan, K. Features and development of Coot. *Acta Cryst.* 2010, D66, 486-501.

Figure S1.

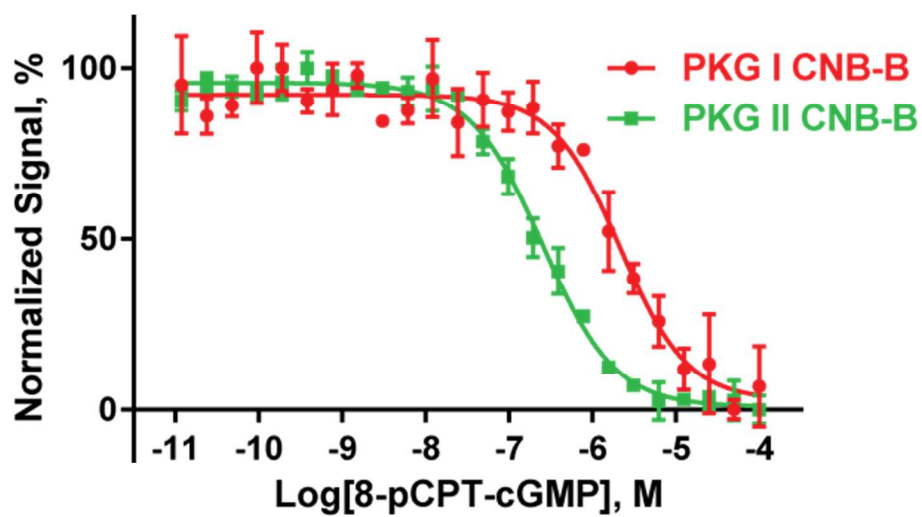

| Protein      | EC <sub>50</sub> ± SD <sup>a</sup> (nM), 8-pCPT-cGMP |
|--------------|------------------------------------------------------|
| PKG Iβ CNB-B | 1.627 ± 0.264 uM                                     |
| PKG II CNB-B | 0.259 ± 0.009 uM                                     |

<sup>a</sup> mean values with standard deviation (SD) of at least four replicates

**Table S1.** Room-temperature crystallographic data collection and joint XN refinement statistics.

| PKG II:8-pCPT-cGMP                            |                         |                                         |
|-----------------------------------------------|-------------------------|-----------------------------------------|
| PDB ID 6BQ8                                   |                         |                                         |
| Data collection:                              | Neutron                 | X-ray                                   |
| Beamline/Facility                             | LADI-III/ILL            | Rigaku HighFlux HomeLab                 |
| Space group                                   |                         | $P2_12_12_1$                            |
| Cell dimensions:                              |                         |                                         |
| $a, b, c$ (Å)                                 |                         | 43.65, 51.30, 68.20                     |
| $\alpha, \beta, \gamma$ (°)                   |                         | 90, 90, 90                              |
| Resolution (Å)                                | 40.00-2.20 (2.32-2.20)* | 10.00-2.00 (2.06-2.00)                  |
| No. reflections measured                      | 21665 (1420)            | 34375 (2454)                            |
| No. reflections unique                        | 5966 (589)              | 10492 (770)                             |
| $R_{\text{merge}}$                            | 0.141 (0.190)           | 0.064 (0.535)                           |
| $I / \sigma I$                                | 7.5 (4.5)               | 12.5 (2.8)                              |
| Completeness (%)                              | 74.7 (51.9)             | 97.3 (97.6)                             |
| Redundancy                                    | 3.6 (2.4)               | 3.3 (3.2)                               |
| <b>Joint XN Refinement:</b>                   |                         |                                         |
| Resolution (neutron, Å)                       |                         | 40-2.20                                 |
| Resolution (X-ray, Å)                         |                         | 40-2.00                                 |
| Data rejection criteria                       |                         | no observation & $ F =0$                |
| Sigma cut-off                                 |                         | 2.0                                     |
| No. reflections (neutron)                     |                         | 5949                                    |
| No. reflections (X-ray)                       |                         | 10401                                   |
| $R_{\text{work}} / R_{\text{free}}$ (neutron) |                         | 0.232 / 0.288                           |
| $R_{\text{work}} / R_{\text{free}}$ (X-ray)   |                         | 0.199 / 0.245                           |
| No. atoms                                     |                         |                                         |
| Protein including H and D                     |                         | 2410                                    |
| Ligand                                        |                         | 45                                      |
| Metal                                         |                         | 1                                       |
| MPD                                           |                         | 22                                      |
| Water                                         |                         | 120 (40 D <sub>2</sub> O <sub>s</sub> ) |
| B-factors                                     |                         |                                         |
| Protein                                       |                         | 37.7                                    |
| Ligand                                        |                         | 26.7                                    |
| Water                                         |                         | 46.3                                    |
| R.m.s. deviations                             |                         |                                         |
| Bond lengths (Å)                              |                         | 0.007                                   |
| Bond angles (°)                               |                         | 0.931                                   |

\* Values in parentheses are for highest-resolution shell. Data were collected from 1 crystal for each structure.



**Table S2.** Comparison of the backbone amide H/D exchange in PKG II and PKG I.

‘Non-exchanged’ corresponds to the positions with the D atom occupancy in the range  $-0.56 \div 0$ , i.e. between 0 and 36% ( $\sim 1/3$ ) of D.

‘Partially’ is for partially exchanged positions; D atom occupancy of  $0.01 \div 0.49$ , i.e. between 36% ( $\sim 1/3$ ) and 68% ( $\sim 2/3$ ) of D.

‘Fully’ is for fully exchanged positions; D occupancy of  $0.50 \div 1$ , i.e. between 68% ( $\sim 2/3$ ) and 100% (1.0) of D.

Residues are arranged side-by-side in the columns according to the sequence alignment published in reference 1 listed above.

Disordered residues that are not visible in the electron density are labeled ‘Not visible in the structure’ and are not numbered.

PBC residues are colored blue; additional residues that make hydrogen bonds with 8-pCPT-cGMP are colored green.

| PKG II  |                  |               | PKG I   |                              |               |
|---------|------------------|---------------|---------|------------------------------|---------------|
| Residue | D atom occupancy | H/D status    | Residue | D atom occupancy             | H/D status    |
| 269 Thr | -0.28            | Non-exchanged | Thr     | Not visible in the structure |               |
| 270 Ala | 1.0              | Fully         | Gly     | Not visible in the structure |               |
| 271 Gln | 1.0              | Fully         | Leu     | Not visible in the structure |               |
| 272 Ala | 0.99             | Fully         | Ile     | Not visible in the structure |               |
| 273 Arg | 1.0              | Fully         | 223 Lys | 0.58                         | Fully         |
| 274 Asp | 1.0              | Fully         | 224 His | 1.0                          | Fully         |
| 275 Glu | 0.57             | Fully         | 225 Thr | 1.0                          | Fully         |
| 276 Glu | 1.0              | Fully         | 226 Glu | 1.0                          | Fully         |
| 277 Tyr | 1.0              | Fully         | 227 Tyr | 1.0                          | Fully         |
| 278 Arg | -0.15            | Non-exchanged | 228 Met | 1.0                          | Fully         |
| 279 Asn | 1.0              | Fully         | 229 Glu | 1.0                          | Fully         |
| 280 Phe | 0.45             | Partially     | 230 Phe | 1.0                          | Fully         |
| 281 Leu | -0.56            | Non-exchanged | 231 Leu | 0.24                         | Partially     |
| 282 Arg | -0.34            | Non-exchanged | 232 Lys | 0.41                         | Partially     |
| 283 Ser | 0.23             | Partially     | 233 Ser | 1.0                          | Fully         |
| 284 Val | 0.36             | Partially     | 234 Val | -0.19                        | Non-exchanged |
| 285 Ser | 0.32             | Partially     | 235 Pro |                              |               |
| 286 Leu | 0.57             | Fully         | 236 Thr | 0.85                         | Fully         |
| 287 Leu | 0.86             | Fully         | 237 Phe | 0.0                          | Non-exchanged |
| 288 Lys | 0.53             | Fully         | 238 Gln | 0.51                         | Fully         |
| 289 Asn | 0.37             | Partially     | 239 Ser | 1.0                          | Fully         |
| 290 Leu | 0.49             | Partially     | 240 Leu | 0.83                         | Fully         |
| 291 Pro |                  |               | 241 Pro |                              |               |

|         |       |               |         |       |               |
|---------|-------|---------------|---------|-------|---------------|
| 292 Glu | 1.0   | Fully         | 242 Glu | 0.4   | Partially     |
| 293 Asp | 0.62  | Fully         | 243 Glu | 1.0   | Fully         |
| 294 Lys | 1.0   | Fully         | 244 Ile | 0.46  |               |
| 295 Leu | -0.12 | Non-exchanged | 245 Leu | -0.55 | Non-exchanged |
| 296 Thr | 0.65  | Fully         | 246 Ser | -0.56 | Non-exchanged |
| 297 Lys | 0.38  | Partially     | 247 Lys | 0.52  | Fully         |
| 298 Ile | -0.56 | Non-exchanged | 248 Leu | -0.29 | Non-exchanged |
| 299 Ile | -0.56 | Non-exchanged | 249 Ala | -0.06 | Non-exchanged |
| 300 Asp | -0.24 | Non-exchanged | 250 Asp | 1.0   | Fully         |
| 301 Cys | -0.56 | Non-exchanged | 251 Val | 0.67  | Fully         |
| 302 Leu | 0.3   | Partially     | 252 Leu | 1.0   | Fully         |
| 303 Glu | -0.56 | Non-exchanged | 253 Glu | -0.49 | Non-exchanged |
| 304 Val | -0.56 | Non-exchanged | 254 Glu | 0.83  | Fully         |
| 305 Glu | -0.56 | Non-exchanged | 255 Thr | -0.56 | Non-exchanged |
| 306 Tyr | 1.0   | Fully         | 256 His | 0.86  | Fully         |
| 307 Tyr | -0.32 | Non-exchanged | 257 Tyr | -0.44 | Non-exchanged |
| 308 Asp | 1.0   | Fully         | 258 Glu | 0.19  | Partially     |
| 309 Lys | 0.46  | Partially     | 259 Asn | 0.19  | Partially     |
| 310 Gly | 0.73  | Fully         | 260 Gly | 1.0   | Fully         |
| 311 Asp | 0.19  | Partially     | 261 Glu | -0.56 | Non-exchanged |
| 312 Tyr | 0.39  | Partially     | 262 Tyr | 0.40  | Partially     |
| 313 Ile | -0.14 | Non-exchanged | 263 Ile | -0.27 | Non-exchanged |
| 314 Ile | -0.42 | Non-exchanged | 264 Ile | -0.16 | Non-exchanged |
| 315 Arg | 0.84  | Fully         | 265 Arg | 1.0   | Fully         |
| 316 Glu | -0.56 | Non-exchanged | 266 Gln | -0.56 | Non-exchanged |
| 317 Gly | 0.11  | Partially     | 267 Gly | 1.0   | Fully         |
| 318 Glu | 0.59  | Fully         | 268 Ala | 0.93  | Fully         |
| 319 Glu | 0.82  | Fully         | 269 Arg | 0.41  | Partially     |
| 320 Gly | 0.95  | Fully         | 270 Gly | 0.74  | Fully         |
| 321 Ser | 1.0   | Fully         | 271 Asp | 1.0   | Fully         |
| 322 Thr | 0.21  | Partially     | 272 Thr | 1.0   | Fully         |
| 323 Phe | -0.56 | Non-exchanged | 273 Phe | 0.0   | Non-exchanged |
| 324 Phe | -0.11 | Non-exchanged | 274 Phe | -0.5  | Non-exchanged |
| 325 Ile | -0.56 | Non-exchanged | 275 Ile | -0.31 | Non-exchanged |
| 326 Leu | -0.16 | Non-exchanged | 276 Ile | -0.56 | Non-exchanged |
| 327 Ala | -0.43 | Non-exchanged | 277 Ser | -0.56 | Non-exchanged |
| 328 Lys | -0.56 | Non-exchanged | 278 Lys | 0.19  | Partially     |
| 329 Gly | 0.94  | Fully         | 279 Gly | 1.0   | Fully         |
| 330 Lys | 0.87  | Fully         | 280 Thr | 0.41  | Partially     |
| 331 Val | -0.54 | Non-exchanged | 281 Val | 0.17  | Partially     |

|         |       |               |         |                              |               |
|---------|-------|---------------|---------|------------------------------|---------------|
| 332 Lys | -0.56 | Non-exchanged | 282 Asn | -0.35                        | Non-exchanged |
| 333 Val | -0.56 | Non-exchanged | 283 Val | -0.31                        | Non-exchanged |
| 334 Thr | -0.56 | Non-exchanged | 284 Thr | -0.56                        | Non-exchanged |
| 335 Gln | 0.74  | Fully         | 285 Arg | 0.05                         | Partially     |
| 336 Ser | 0.76  | Fully         | 286 Glu | 0.24                         | Partially     |
| 337 Thr | 0.82  | Fully         | 287 Asp | 0.83                         | Fully         |
| 338 Glu | 1.0   | Fully         | 288 Ser | -0.39                        | Non-exchanged |
| 339 Gly | 0.27  | Partially     | 289 Pro |                              |               |
| 340 His | 1.0   | Fully         | 290     | Not visible in the structure |               |
| 341 Asp | 1.0   | Fully         | 291     | Not visible in the structure |               |
| 342 Gln | -0.41 | Non-exchanged | 292 Asp | 0.56                         | Fully         |
| 343 Pro |       |               | 293 Pro |                              |               |
| 344 Gln | 1.0   | Fully         | 294 Val | 0.77                         | Fully         |
| 345 leu | 1.0   | Fully         | 295 Phe | 0.9                          | Fully         |
| 346 Ile | -0.56 | Non-exchanged | 296 Leu | 0.94                         | Fully         |
| 347 Lys | -0.43 | Non-exchanged | 297 Arg | 0.94                         | Fully         |
| 348 Thr | -0.14 | Non-exchanged | 298 Thr | 0.78                         | Fully         |
| 349 Leu | -0.56 | Non-exchanged | 299 Leu | 0.49                         | Partially     |
| 350 Gln | 1.0   | Fully         | 300 Gly | 0.18                         | Partially     |
| 351 Lys | 1.0   | Fully         | 301 Lys | 0.18                         | Partially     |
| 352 Gly | 1.0   | Fully         | 302 Gly | 1.0                          | Fully         |
| 353 Glu | -0.56 | Non-exchanged | 303 Asp | -0.10                        | Non-exchanged |
| 354 Tyr | -0.56 | Non-exchanged | 304 Trp | 0.47                         | Partially     |
| 355 Phe | -0.26 | Non-exchanged | 305 Phe | -0.56                        | Non-exchanged |
| 356 Gly | -0.56 | Non-exchanged | 306 Gly | -0.56                        | Non-exchanged |
| 357 Glu | 0.73  | Fully         | 307 Glu | -0.56                        | Non-exchanged |
| 358 Lys | 1.0   | Fully         | 308 Lys | 0.0                          | Non-exchanged |
| 359 Ala | -0.34 | Non-exchanged | 309 Ala | -0.56                        | Non-exchanged |
| 360 Leu | -0.16 | Non-exchanged | 310 Leu | -0.56                        | Non-exchanged |
| 361 Ile | -0.21 | Non-exchanged | 311 Gln | 0.79                         | Fully         |
| 362 Ser | 0.49  | Partially     | 312 Gly | 0.7                          | Fully         |
| 363 Asp | 0.65  | Fully         | 313 Glu | 1.0                          | Fully         |
| 364 Asp | 1.0   | Fully         | 314 Asp | 0.67                         | Fully         |
| 365 Val | 0.75  | Fully         | 315 Val | 0.13                         | Partially     |
| 366 Arg | -0.49 | Non-exchanged | 316 Arg | -0.50                        | Non-exchanged |
| 367 Ser | -0.01 | Non-exchanged | 317 Thr | 0.23                         | Partially     |
| 368 Ala | -0.24 | Non-exchanged | 318 Ala | -0.44                        | Non-exchanged |
| 369 Asn | -0.56 | Non-exchanged | 319 Asn | 0.07                         | Partially     |
| 370 Ile | -0.56 | Non-exchanged | 320 Val | -0.50                        | Non-exchanged |
| 371 Ile | -0.56 | Non-exchanged | 321 Ile | -0.21                        | Non-exchanged |

|         |       |               |         |                              |               |
|---------|-------|---------------|---------|------------------------------|---------------|
| 372 Ala | 0.18  | Partially     | 322 Ala | -0.56                        | Non-exchanged |
| 373 Glu | 1.0   | Fully         | 323 Ala | 1.0                          | Fully         |
| 374 Glu | 0.11  | Partially     | 324 Glu | 1.0                          | Fully         |
| 375 Asn | 0.83  | Fully         | 325 Ala | 0.38                         | Partially     |
| 376 Asp | 0.89  | Fully         |         |                              |               |
| 377 Val | 0.93  | Fully         | 326 Val | 0.16                         | Partially     |
| 378 Ala | -0.56 | Non-exchanged | 327 Thr | 0.25                         | Partially     |
| 379 Cys | -0.56 | Non-exchanged | 328 Cys | -0.56                        | Non-exchanged |
| 380 Leu | -0.29 | Non-exchanged | 329 Leu | 0.0                          | Non-exchanged |
| 381 Val | -0.56 | Non-exchanged | 330 Val | -0.56                        | Non-exchanged |
| 382 Ile | -0.56 | Non-exchanged | 331 Ile | -0.56                        | Non-exchanged |
| 383 Asp | 0.45  | Partially     | 332 Asp | 1.0                          | Fully         |
| 384 Arg | 0.69  | Fully         | 333 Arg | 0.69                         | Fully         |
| 385 Glu | -0.09 | Non-exchanged | 334 Asp | 0.81                         | Fully         |
| 386 Thr | 0.40  | Partially     | 335 Ser | 1.0                          | Fully         |
| 387 Phe | -0.56 | Non-exchanged | 336 Phe | -0.16                        | Non-exchanged |
| 388 Asn | 1.0   | Fully         | 337 Lys | 0.75                         | Fully         |
| 389 Gln | 0.68  | Fully         | 338 His | 1.0                          | Fully         |
| 390 Thr | 1.0   | Fully         | 339 Leu | 0.87                         | Fully         |
| 391 Val | 0.64  | Fully         | 340 Ile | 1.0                          | Fully         |
| 392 Gly | 0.6   | Fully         | 341 Gly | 0.44                         | Partially     |
| 393 Thr | -0.44 | Non-exchanged | 342 Gly | 0.72                         | Fully         |
| 394 Phe | 1.0   | Fully         | 343 leu | 1.0                          | Fully         |
| 395 Glu | 1.0   | Fully         | 344 Asp | 1.0                          | Fully         |
| 396 Glu | 1.0   | Fully         | 345 Asp | 1.0                          | Fully         |
| 397 Leu | 0.66  | Fully         | 346 Val | 1.0                          | Fully         |
| 398 Gln | 0.6   | Fully         | 347 ser | 1.0                          | Fully         |
|         |       |               | 348 Asn | 0.60                         | Fully         |
| 399 Lys | 0.55  | Fully         | 349 Lys | 0.64                         | Fully         |
| 400 Tyr | 0.42  | Partially     | 350 Ala | -0.19                        | Non-exchanged |
| 401 Leu | 0.90  | Fully         | 351 Tyr | 0.65                         | Fully         |
| 402 Glu | 0.90  | Fully         | Glu     | Not visible in the structure |               |
| 403 Gly | 1.0   | Fully         | Asp     | Not visible in the structure |               |
| 404 Tyr | 1.0   | Fully         | Ala     | Not visible in the structure |               |
| 405 Val | -0.56 | Non-exchanged | Glu     | Not visible in the structure |               |
| 406 Ala | 0.54  | Fully         | Ala     | Not visible in the structure |               |
| 407 Asn | 1.0   | Fully         | Lys     | Not visible in the structure |               |
| 408 Leu | -0.56 | Non-exchanged | Ala     | Not visible in the structure |               |
| 409 Asn | 1.0   | Fully         | Lys     | Not visible in the structure |               |
| 410 Arg | 1.0   | Fully         | Tyr     | Not visible in the structure |               |

|         |      |       |     |                              |
|---------|------|-------|-----|------------------------------|
| 411 Asp | 1.0  | Fully | Glu | Not visible in the structure |
| 412 Asp | 0.63 | Fully | Ala | Not visible in the structure |
| 413 Glu | 0.50 | Fully | Glu | Not visible in the structure |
| 414 Lys | 0.58 | Fully | Ala | Not visible in the structure |
| 415 Arg | 1.0  | Fully | Ala | Not visible in the structure |
| 416 His | 0.69 | Fully | Phe | Not visible in the structure |
| 417 Ala | 1.0  | Fully | Phe | Not visible in the structure |
| 418 Lys | 1.0  | Fully | Ala | Not visible in the structure |
|         |      |       | Asn | Not visible in the structure |
